# Supplementary material
Source: publisher site journal article supplement (https://kjim.org/upload/media/kjim-2024-439-Supplementary-Fig-4.pdf)
Supplement: Supplementary file 1 [file kjim-2024-439-Supplementary-Fig-4.pdf]

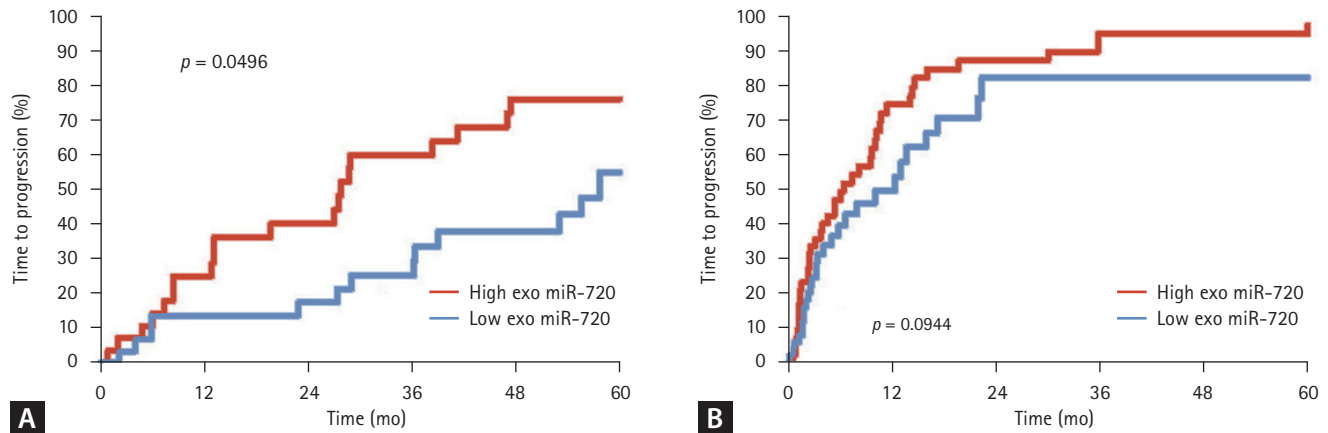

**Supplementary Figure 4.** Time to progression stratified by tumor stage. Time to HCC progression after TACE in patients with (A) HCC mUICC stage I and II and (B) HCC mUICC stage III and IV. Patients with higher exo miR-720 levels exhibited significantly earlier tumor progression after TACE in those with HCC stage I and II ( $p = 0.0496$ ), with a similar trend observed in those with HCC stage III and IV ( $p = 0.0944$ ). Tumor stage was determined using the mUICC staging system [2]. HCC, hepatocellular carcinoma; TACE, transarterial chemoembolization; mUICC, modified Union for International Cancer Control; exo miR-720, exosomal miRNA-720.
